# Supplementary material for: Facile synthesis strategy for cesium tin halide perovskite crystals toward light emitting devices and anti-counterfeiting flexible fiber
Source: Royal Society of Chemistry journal article supplement (doi:10.1039/d3nr00301a), 2023-01-01
Supplement: d3nr00301a1.pdf [file d3nr00301a1.pdf]

## Supporting Information

### Facile synthesis strategy for cesium tin halide perovskite crystals toward light emitting devices and anti-counterfeiting flexible fiber

*Ziyao Hu,<sup>a</sup> Kun Nie,<sup>\*a, b</sup> Xuyi Wang,<sup>\*c</sup> Xiuqiang Duan,<sup>a</sup> Ranran Zhou,<sup>a</sup> Mengyun Wu,<sup>a</sup> Xiaoxue Ma,<sup>\*a</sup>  
Xiaodong Zhang,<sup>a</sup> Luoxin Wang,<sup>a</sup> Lefu Mei<sup>d</sup> and Hua Wang<sup>a</sup>*

<sup>a</sup>Hubei Key Laboratory for New Textile Materials and Applications and State Key Laboratory of New Textile Materials & Advanced Processing Technology, School of Materials Science and Engineering, Wuhan Textile University, Wuhan 430200, P. R. China. E-mail: knie@wtu.edu.cn, xxma@wtu.edu.cn

<sup>b</sup>Key Laboratory of Testing and Tracing of Rare Earth Products for State Market Regulation, Jiangxi University of Science and Technology, Ganzhou 341000, P. R. China.

<sup>c</sup>China Bluestar Chengrand Co., Ltd, High Tech Organic Fiber Key Laboratory of Sichuan Province, Chengdu 610042, P. R. China. E-mail: xuyiwang2015@163.com

<sup>d</sup>Beijing Key Laboratory of Materials Utilization of Nonmetallic Minerals and Solid Wastes, National Laboratory of Mineral Materials, School of Materials Science and Technology, China University of Geosciences (Beijing), Beijing 100083, P. R. China.

## 1. Experimental sections

**1.1 Chemical and materials:** Cesium carbonate ( $\text{Cs}_2\text{CO}_3$ , 99.99%), tin chloride ( $\text{SnCl}_2$ , 99%), ethanol, and hydrochloric acid (HCl, AR) were purchased from Aladdin Chemical Co., Ltd. (Shanghai, China). Tellurium tetrachloride ( $\text{TeCl}_4$ , 99%) was purchased from Shanghai Macklin Biochemical Co., Ltd. (China). Polyphenylene sulfide resin (PPS, melting temperature = 285 °C;  $M_w = 48,000$ ) was supplied by Deyang Chemical Co., Ltd. (China). Aramid chopped fibers (ACFs) were supplied by China BlueStar Chengrand Research Institute of Chemical Industry. Polyethylene oxide (PEO,  $M_w = 2 \times 10^6$ ) was purchased from Sumitomo Keiretsu Co., Ltd., Japan. Anionic polyacrylamide (APAM,  $M_w = 3 \times 10^6$ ), acetone, and sodium dodecylbenzene sulfonate (SDS) were purchased from China Pharmaceutical Group Chemical Reagent Co., Ltd. Silicone defoamer was provided by Lusen Chemical Co., Ltd. (China). 385 nm near-ultraviolet (n-UV) chips (3 W, 600 mA) were provided by Suzhou Uking Photoelectric Technology Co., Ltd. (China). Silicone glue was purchased from Shenzhen Tongxin Lida Technology Co., Ltd. (China). DC-regulated power supply (0-15 V) was purchased from Dongguan Maisheng Power Technology Co., Ltd. (China). All chemicals were used directly without further purification.

**1.2 Synthesis of  $\text{Cs}_2\text{Sn}_{1-x}\text{Te}_x\text{Cl}_6$  perovskite crystals (PCs):**  $\text{Cs}_2\text{Sn}_{1-x}\text{Te}_x\text{Cl}_6$  PCs were synthesized by a more convenient hydrothermal method.  $x$  mmol of  $\text{TeCl}_4$  and  $0.50 - x$  mmol of  $\text{SnCl}_2$  were placed within a 100 mL three-neck flask. 3 mL of HCl and 16 mL of ethanol were injected into the three-neck flask. The solution was heated to 80 °C with stirring for 30 min until the solution became clear. Subsequently, 0.5 mmol of  $\text{Cs}_2\text{CO}_3$  (dissolved in 1 mL of HCl) was swiftly injected into the solution, and the  $\text{Cs}_2\text{Sn}_{1-x}\text{Te}_x\text{Cl}_6$  PCs were immediately precipitated. The solution was kept at 80 °C with stirring for 60 min for the complete reaction. The solution was purified by centrifugation at 6000 rpm for 5 min. The precipitate was collected, and the supernatant was discarded. Finally, the  $\text{Cs}_2\text{Sn}_{1-x}\text{Te}_x\text{Cl}_6$  PCs were washed with ethanol and dried at 60 °C for 6 h. Solid crystals were collected for the characterization of

optical properties and other properties. Meanwhile, we kept some of the original  $\text{Cs}_2\text{Sn}_{1-x}\text{Te}_x\text{Cl}_6$  PCs solution to post-process the ACFs/PPS compound fiber paper.

**1.3 Preparation of ACFs/PPS compound fiber paper:** First, the ACFs and PPS microfiber non-woven fabrics were cleaned with acetone to remove impurities. PPS ultrafine fiber pulp was made of PPS non-woven fabric with a valley-type beating machine. Then, APAM, SDS and PEO (with a mass ratio of 1:3:6) are stirred at room temperature in deionized water for 4h to obtain a uniform dispersion solution. Next, PPS ultrafine fiber pulp and ACFs (with a mass ratio of 3:7) were added to the dispersion and dispersed by a fiber dissociator. Finally, the mixed fiber suspension was directly used for wet papermaking on the paper machine to obtain ACFs/PPS composite fiber paper.

**1.4 Preparation of ACFs/PPS compound fiber paper modified with  $\text{Cs}_2\text{Sn}_{1-x}\text{Te}_x\text{Cl}_6$  PCs:** The prepared ACFs/PPS compound fiber paper was cut into regular shapes. Subsequently, the paper was post-processed with  $\text{Cs}_2\text{Sn}_{1-x}\text{Te}_x\text{Cl}_6$  PCs solution for 4 h. Then, the modified paper was dried in a drying oven at 60 °C for 6 h. The ACFs/PPS compound fiber paper with fluorescent anti-counterfeiting was prepared.

**1.5 Fabrication and characterizations of LED:** Normally, 20 mg of  $\text{Cs}_2\text{Sn}_{0.94}\text{Te}_{0.06}\text{Cl}_6$  PCs and 200 mg of AB silicone glue were uniformly mixed together. Then the mixture was coated on the 385 nm n-UV chip to obtain the LED. The device was cured at 60 °C for 4 h. Electroluminescence spectrum was measured by debugging the fluorescence spectrophotometer (HITACHI, F-4700). Specific operations can be summarized as follows:

The emission port of the fluorescence spectrophotometer was closed. The voltage of the LED to 5 V and the current to 600 mA were set with the external DC-regulated power supply, and then the LED was faced with the receiving port of the fluorescence spectrophotometer to measure the EL spectrum of LED.

**1.6 Characterizations:** X-ray diffraction (XRD) patterns were measured by an X-ray Powder diffractometer (PANalytical B.V., Empyrean) to determine the crystal structure of samples. The elemental composition and chemical state of samples were identified by X-ray photoelectron spectroscopy (XPS, Thermo Scientific, K-

Alpha). The morphology and lattice spacing of samples were observed by scanning electron microscope (SEM). The element distribution was analyzed by energy-dispersive spectrometry (EDS, attached on the SEM, TESCAN MIRA LMS/TESCAN MIRA4 (Czech Republic)). The photoluminescence (PL), photoluminescence excitation (PLE) spectra, electroluminescence (EL), and temperature-dependent PL spectra were measured with the fluorescence spectrophotometer (HITACHI, F-4700). The photoluminescence quantum yield (PLQY) and PL decay were measured with fluorescence spectrometers (Edinburgh, FLS1000). Thermo gravimetric analysis (TGA) was measured with a thermal gravimetric analyzer (NETZSCH, TG209F1).

**Tab. S1** Chemical composition (at %) of  $\text{Cs}_2\text{Sn}_{1-x}\text{Te}_x\text{Cl}_6$  perovskite crystals measured by EDS.

| x    | Cs    | Sn    | Te   | Cl    |
|------|-------|-------|------|-------|
| 0    | 24.72 | 11.72 | 0    | 63.56 |
| 0.01 | 24.77 | 11.74 | 0.3  | 63.19 |
| 0.02 | 23.55 | 11.63 | 0.32 | 64.5  |
| 0.03 | 24.1  | 11.7  | 0.49 | 63.71 |
| 0.04 | 24.58 | 11.7  | 0.68 | 63.04 |
| 0.05 | 24.32 | 11.13 | 0.59 | 63.96 |

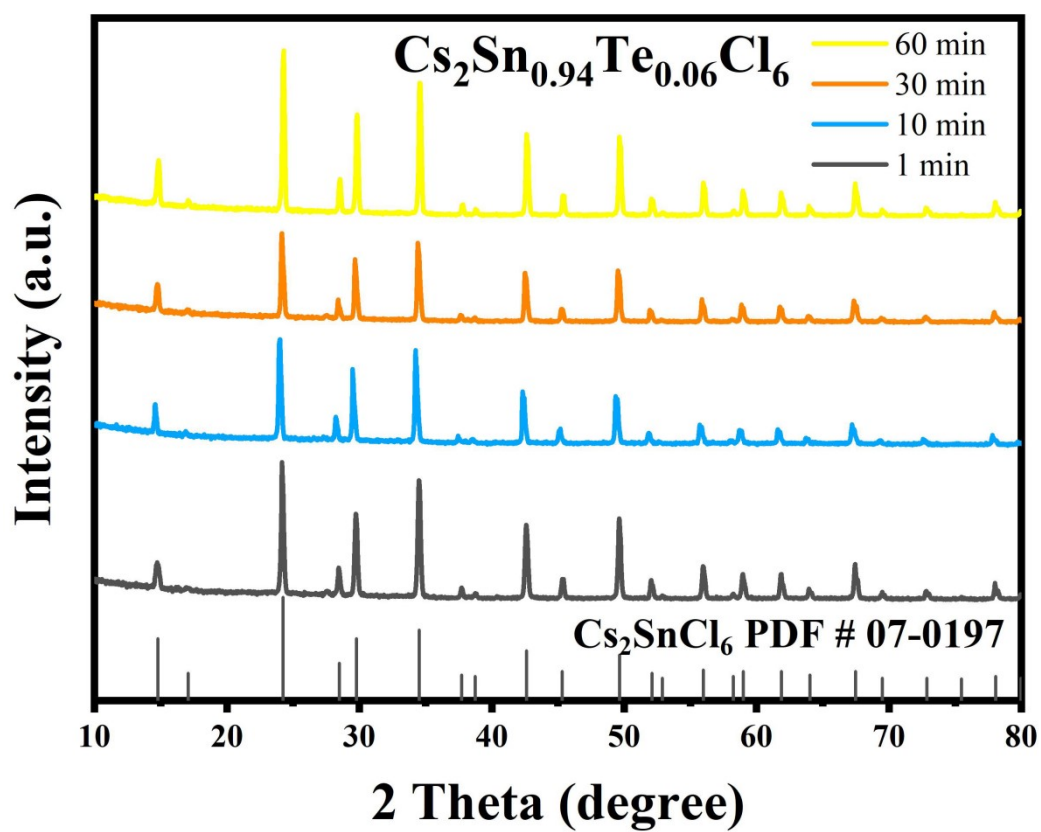

Fig. S1 The XRD patterns of  $\text{Cs}_2\text{Sn}_{0.94}\text{Te}_{0.06}\text{Cl}_6$  with different reaction time.

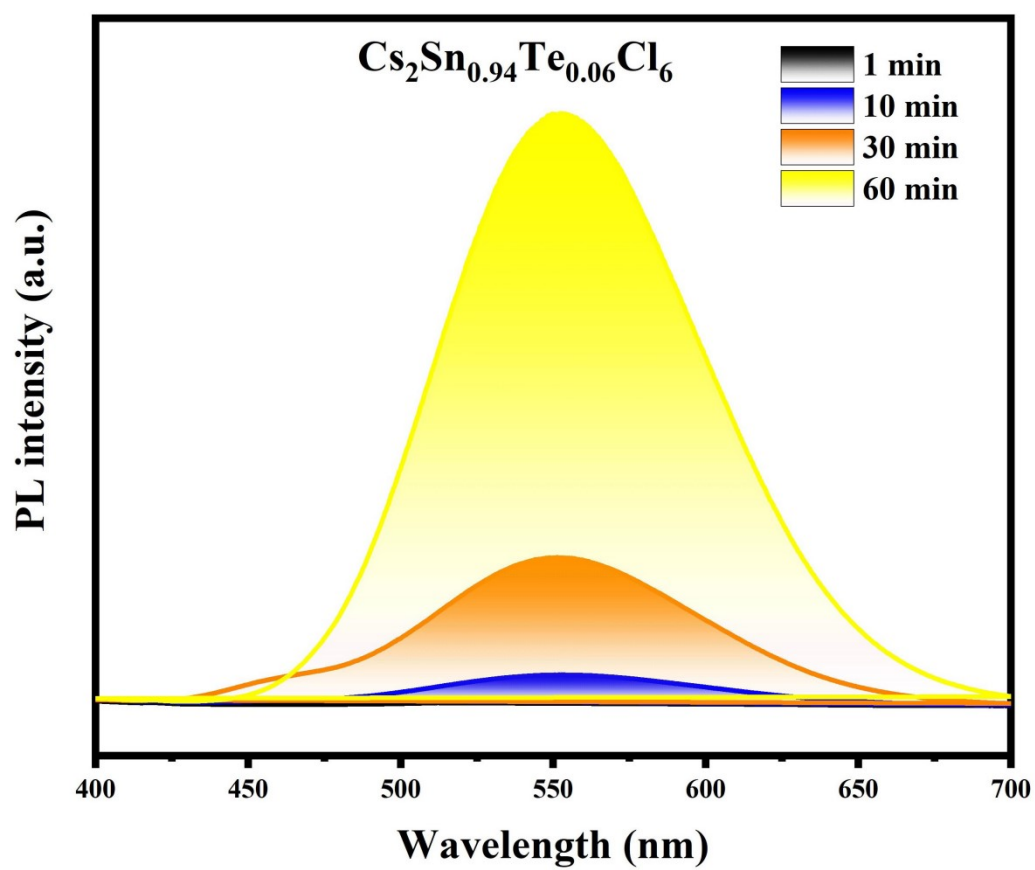

**Fig. S2** The PL spectra of  $\text{Cs}_2\text{Sn}_{0.94}\text{Te}_{0.06}\text{Cl}_6$  with different reaction time.

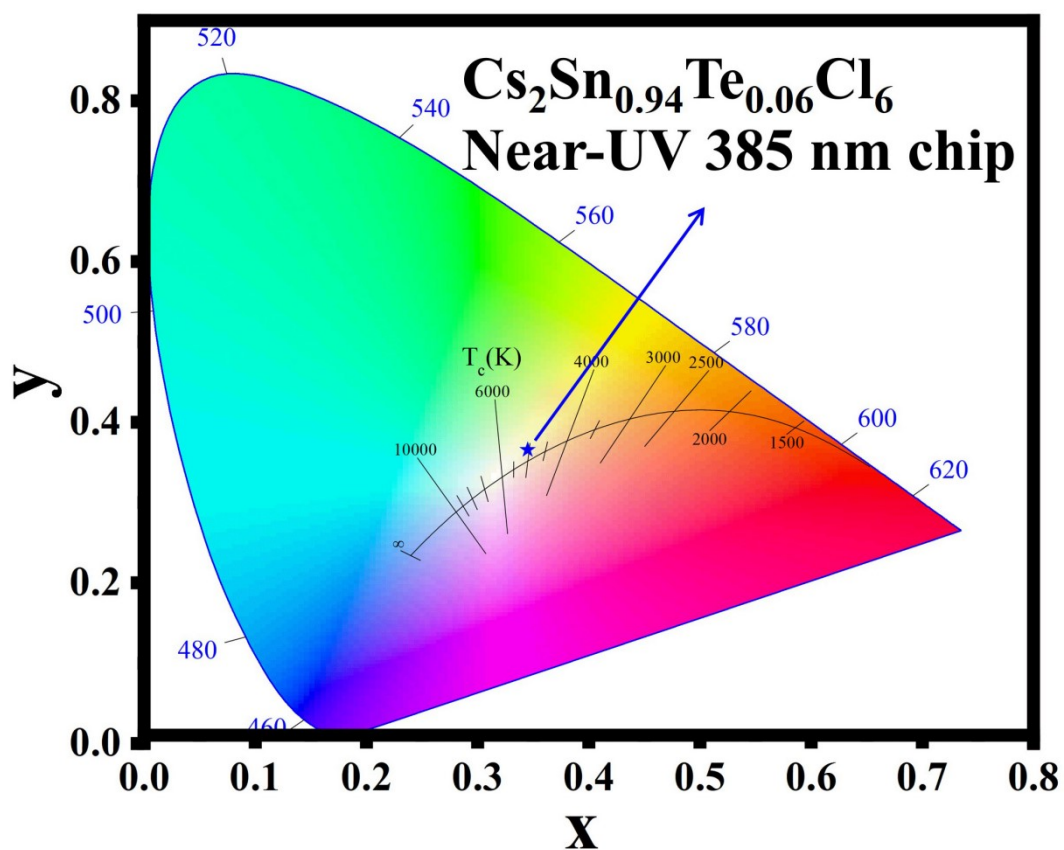

**Fig. S3** Chromaticity coordinates (CIE 1931) of light-emitting diode (LED) lamp fabricated via the combination of a near-ultraviolet 385 nm chip and  $\text{Cs}_2\text{Sn}_{0.94}\text{Te}_{0.06}\text{Cl}_6$  perovskite crystals.



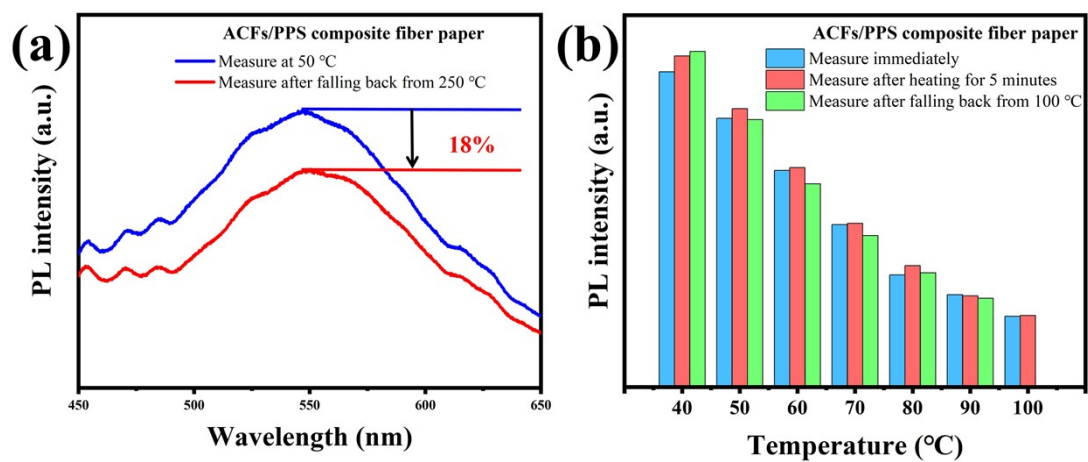

**Fig. S4** (a) PL spectra of ACFs/PPS composite fiber paper were measured at 50 °C and after falling back from 250 °C. (b) PL intensities of ACFs/PPS composite fiber paper were measured at different temperatures.
